# Supplementary material for: Novel pyrromethene dyes with N-ethyl carbazole at the meso position: a comprehensive photophysical, lasing, photostability and TD-DFT study
Source: Royal Society of Chemistry journal article supplement (doi:10.1039/c5cp01741f), 2015-01-01
Supplement: c5cp01741f1.pdf [file c5cp01741f1.pdf]

## SUPPORTING INFORMATION

### **Novel Pyrromethene dyes with N-ethyl carbazole at *meso* position: a comprehensive photophysical, lasing, photostability and TD-DFT study†**

Kishor G. Thorat,<sup>a</sup> Priyadarshani Kamble,<sup>b</sup> Alok K. Ray\*<sup>b</sup> and Nagaiyan Sekar\*<sup>a</sup>

| <b>Table of content</b>                                                                                                                                                                                                           | <b>Page no.</b> |
|-----------------------------------------------------------------------------------------------------------------------------------------------------------------------------------------------------------------------------------|-----------------|
| 1 <b>Table S1</b> Mulliken Charges (e.s.u.) on selected atoms of the dyes <b>1-3</b> at their respective optimized ground state and excited state geometries, calculated by using B3LYP/6-31G(d) PCM level of theory in n-heptane | <b>S3</b>       |
| 2 <b>Table S2.</b> Ab initio calculated parameters of PM dyes <b>2-3</b> in solvents of different polarities using TD-DFT (B3LYP/6-31G(d)) PCM method                                                                             | <b>S3</b>       |
| 3 <b>Fig. S1</b> Normalized absorption spectra of the dye <b>2</b> in various solvents                                                                                                                                            | <b>S4</b>       |
| 4 <b>Fig. S2</b> Normalized emission spectra of the dye <b>2</b> in various solvents                                                                                                                                              | <b>S4</b>       |
| 5 <b>Fig. S3</b> Normalized absorption spectra of the dye <b>3</b> in various solvents                                                                                                                                            | <b>S5</b>       |
| 6 <b>Fig. S4</b> Normalized emission spectra of the dye <b>3</b> in various solvents                                                                                                                                              | <b>S5</b>       |
| 7 <b>Fig. S5</b> Optimized structure in GS and Mulliken charges of dye <b>1</b> in GS and ES in solvent n-heptane                                                                                                                 | <b>S6</b>       |
| 8 <b>Fig. S6</b> Optimized structure in GS and Mulliken charges of dye <b>2</b> in GS and ES in solvent n-heptane                                                                                                                 | <b>S6</b>       |
| 9 <b>Fig. S7</b> Optimized structure in GS and Mulliken charges of dye <b>3</b> in GS and ES in solvent n-heptane                                                                                                                 | <b>S7</b>       |
| 10 <b>Fig. S8</b> A schematic of narrow band dye laser set up used for experiments                                                                                                                                                | <b>S7</b>       |
| 11 <b>Fig. S9</b> Plausible reaction mechanism of the dyes <b>2</b> and <b>3</b> with $^1\text{O}_2$                                                                                                                              | <b>S8</b>       |
| 12 <b>Fig. S10</b> $^1\text{H}$ NMR spectrum of Ethyl 4-benzyl-3, 5-dimethyl-1H-pyrrole-2-carboxylate ( <b>6</b> )                                                                                                                | <b>S8</b>       |
| 13 <b>Fig. S11</b> $^{13}\text{C}$ NMR spectrum of Ethyl 4-benzyl-3, 5-dimethyl-1H-pyrrole-2-carboxylate ( <b>6</b> )                                                                                                             | <b>S9</b>       |
| 14 <b>Fig. S12</b> Mass spectrum of Ethyl 4-benzyl-3, 5- dimethyl-1H-pyrrole-2-carboxylate ( <b>6</b> )                                                                                                                           | <b>S9</b>       |
| 15 <b>Fig. S13</b> $^1\text{H}$ NMR spectrum of sodium 4-benzyl-3, 5-dimethyl-1H-pyrrole-2-carboxylate ( <b>7</b> )                                                                                                               | <b>S10</b>      |
| 16 <b>Fig. S14</b> $^{13}\text{C}$ NMR spectrum of sodium 4-benzyl-3, 5- dimethyl-1H-pyrrole-2-carboxylate ( <b>7</b> )                                                                                                           | <b>S10</b>      |
| 17 <b>Fig. S15</b> Mass spectrum of sodium 4-benzyl-3, 5- dimethyl-1H-pyrrole-2-carboxylate ( <b>7</b> )                                                                                                                          | <b>S11</b>      |
| 18 <b>Fig. S16</b> $^1\text{H}$ NMR spectrum of 3-Benzyl-2, 4-dimethyl-1H-pyrrole ( <b>8</b> )                                                                                                                                    | <b>S12</b>      |
| 19 <b>Fig. S17</b> $^{13}\text{C}$ NMR spectrum of 3-Benzyl-2, 4-dimethyl-1H-pyrrole ( <b>8</b> )                                                                                                                                 | <b>S12</b>      |
| 20 <b>Fig. S18</b> Mass spectrum of 3-Benzyl-2, 4-dimethyl-1H-pyrrole ( <b>8</b> )                                                                                                                                                | <b>S13</b>      |
| 21 <b>Fig. S19</b> $^1\text{H}$ NMR spectrum of the dye <b>2</b>                                                                                                                                                                  | <b>S14</b>      |
| 22 <b>Fig. S20</b> $^{13}\text{C}$ NMR spectrum of the dye <b>2</b>                                                                                                                                                               | <b>S15</b>      |
| 23 <b>Fig. S21</b> $^{19}\text{F}$ NMR spectrum of the dye <b>2</b>                                                                                                                                                               | <b>S15</b>      |
| 24 <b>Fig. S22</b> HRMS spectrum of the dye <b>2</b>                                                                                                                                                                              | <b>S16</b>      |
| 25 <b>Fig. S23</b> $^1\text{H}$ NMR spectrum of the dye <b>3</b>                                                                                                                                                                  | <b>S16</b>      |
| 26 <b>Fig. S24</b> $^{13}\text{C}$ NMR spectrum of the dye <b>3</b>                                                                                                                                                               | <b>S17</b>      |
| 27 <b>Fig. S25</b> $^{19}\text{F}$ NMR spectrum of the dye <b>3</b>                                                                                                                                                               | <b>S17</b>      |
| 28 <b>Fig. S26</b> HRMS spectrum of the dye <b>3</b>                                                                                                                                                                              | <b>S18</b>      |

**Table S1:** Mulliken Charges (e.s.u.) on selected atoms of the dyes **1-3** at their respective optimized ground state and excited state geometries, calculated by using B3LYP/6-31G (d) PCM level of theory in n-heptane

| Atom no. | Dye 1             |                   | Dye 2  |        | Dye 3  |        |
|----------|-------------------|-------------------|--------|--------|--------|--------|
|          | GS <sup>[a]</sup> | ES <sup>[b]</sup> | GS     | ES     | GS     | ES     |
| C-1      | +0.087            | +0.091            | +0.088 | +0.080 | +0.097 | +0.089 |
| C-2      | +0.019            | +0.012            | +0.015 | +0.021 | +0.007 | +0.014 |
| C-3      | +0.316            | +0.323            | +0.317 | +0.316 | +0.334 | +0.315 |
| N-3'     | -0.576            | -0.571            | -0.579 | -0.582 | -0.581 | -0.583 |
| B-4      | +0.693            | +0.687            | +0.694 | +0.694 | +0.694 | +0.695 |
| C-7'     | +0.183            | +0.180            | +0.215 | +0.234 | +0.214 | +0.234 |
| C-8      | +0.115            | +0.111            | -0.030 | -0.037 | -0.027 | -0.035 |
| C9       | -0.015            | -0.006            | +0.020 | +0.016 | +0.019 | +0.017 |
| C-10     | -0.056            | -0.059            | -0.055 | -0.056 | -0.123 | -0.123 |
| C-11     | +0.007            | +0.007            | +0.005 | +0.007 | +0.180 | +0.181 |

<sup>[a]</sup>Mulliken charges of molecules in ground state; <sup>[b]</sup>Mulliken charges of molecules in excited state

**Table S2:** Ab initio calculated parameters of PM dyes **2-3** in solvents of different polarities using TD-DFT (B3LYP/6-31G(d)) PCM method

| Solvent           | Dye 2                        |                              |                   |                                   |                                   | Dye 3         |               |                   |                    |                    |
|-------------------|------------------------------|------------------------------|-------------------|-----------------------------------|-----------------------------------|---------------|---------------|-------------------|--------------------|--------------------|
|                   | $E_H$ <sup>[a]</sup><br>(eV) | $E_L$ <sup>[b]</sup><br>(eV) | $E_H-E_L$<br>(eV) | $\mu_0$ <sup>[c]</sup><br>(Debye) | $\mu_1$ <sup>[d]</sup><br>(Debye) | $E_H$<br>(eV) | $E_L$<br>(eV) | $E_H-E_L$<br>(eV) | $\mu_0$<br>(Debye) | $\mu_1$<br>(Debye) |
| DMSO              | -5.365                       | -2.421                       | 2.944             | 8.445                             | 9.236                             | -5.4348       | -2.4865       | 2.9483            | 8.620              | 9.254              |
| DMF               | -5.361                       | -2.417                       | 2.944             | 8.426                             | 9.206                             | -5.4315       | -2.4835       | 2.9480            | 8.600              | 9.230              |
| ACN               | -5.361                       | -2.417                       | 2.944             | 8.422                             | 9.207                             | -5.4310       | -2.4830       | 2.9480            | 8.596              | 9.225              |
| MeOH              | -5.359                       | -2.415                       | 2.944             | 8.413                             | 9.195                             | -5.4296       | -2.4816       | 2.9480            | 8.586              | 9.214              |
| EtOH              | -5.355                       | -2.412                       | 2.943             | 8.381                             | 9.153                             | -5.4225       | -2.4735       | 2.9491            | 8.551              | 9.173              |
| Acetone           | -5.349                       | -2.405                       | 2.943             | 8.352                             | 9.111                             | -5.4198       | -2.4721       | 2.9477            | 8.521              | 9.138              |
| EtOAc             | -5.289                       | -2.349                       | 2.941             | 7.987                             | 8.661                             | -5.3638       | -2.4177       | 2.9461            | 8.128              | 8.558              |
| CHCl <sub>3</sub> | -5.270                       | -2.330                       | 2.940             | 7.861                             | 8.506                             | -5.3453       | -2.4000       | 2.9453            | 7.998              | 8.414              |
| Dioxane           | -5.186                       | -2.250                       | 2.935             | 7.293                             | 7.806                             | -5.2658       | -2.3235       | 2.9423            | 7.405              | 7.768              |
| Heptane           | -5.167                       | -2.235                       | 2.932             | 7.151                             | 7.636                             | -5.2473       | -2.3067       | 2.9407            | 7.264              | 7.608              |

<sup>[a]</sup>Energy of highest occupied molecular orbital (HOMO); <sup>[b]</sup> Energy of lowest unoccupied molecular orbital (LUMO); <sup>[c]</sup>Dipole moment in ground state ( $S_0$ ); <sup>[d]</sup>Dipole moment in excited state ( $S_1$ ).

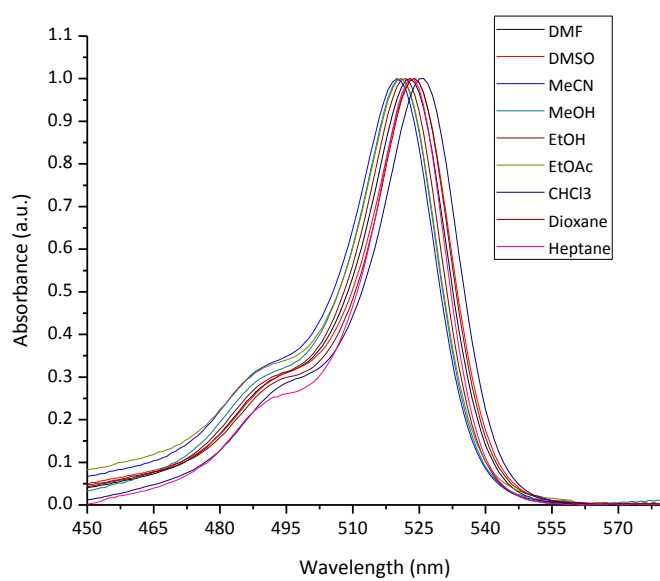

**Fig. S1** Normalized absorption spectra of the dye **2** in various solvents

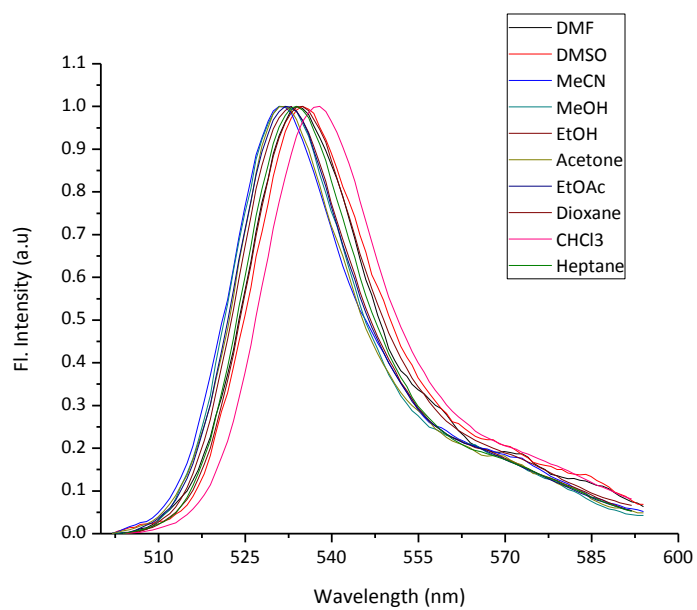

**Fig. S2** Normalized emission spectra of the dye **2** in various solvents

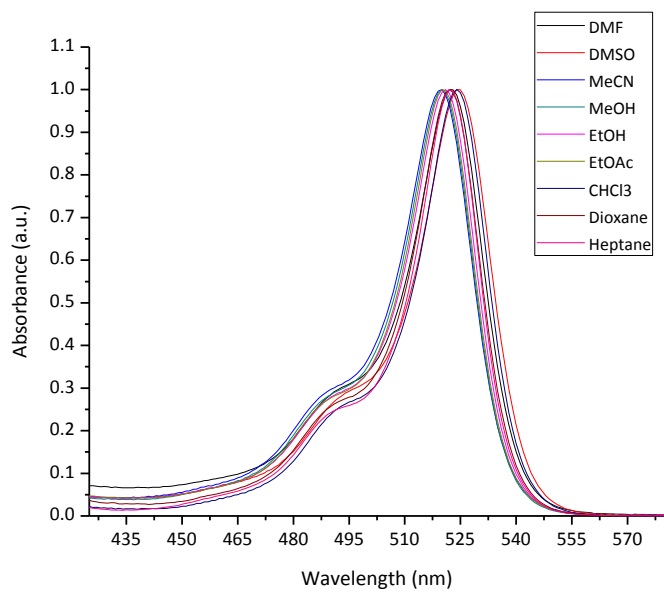

**Fig. S3** Normalized absorption spectra of the dye **3** in various solvents

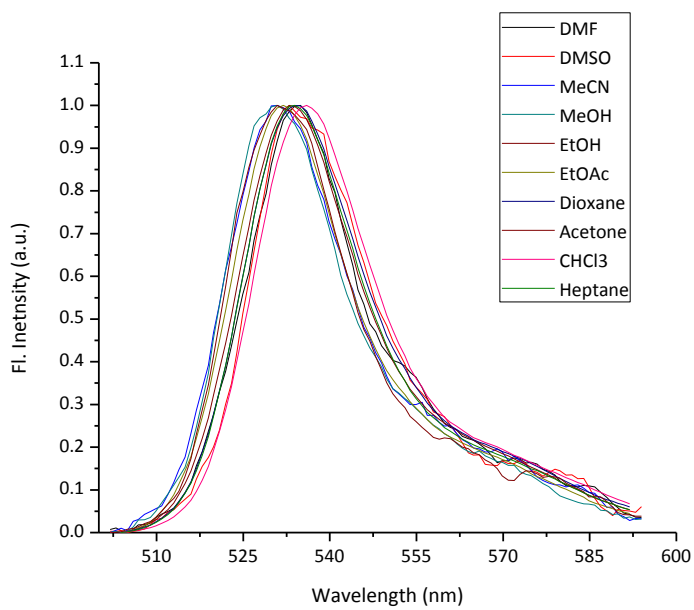

**Fig. S4** Normalized emission spectra of the dye **3** in various solvents

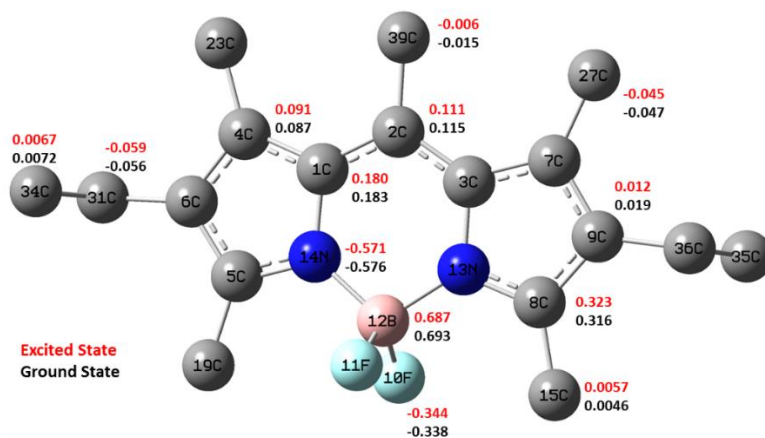

**Fig. S5** Optimized structure in ground ( $S_0$ ) state and Mulliken charges (e.s.u) of the dye 1 in ground state ( $S_0$ ) (black digits) and first excited state ( $S_1$ ) (red digits) in solvent n-heptane, calculated by B3LYP/6-31G(d) level of theory (hydrogen atoms are omitted for more clarity).

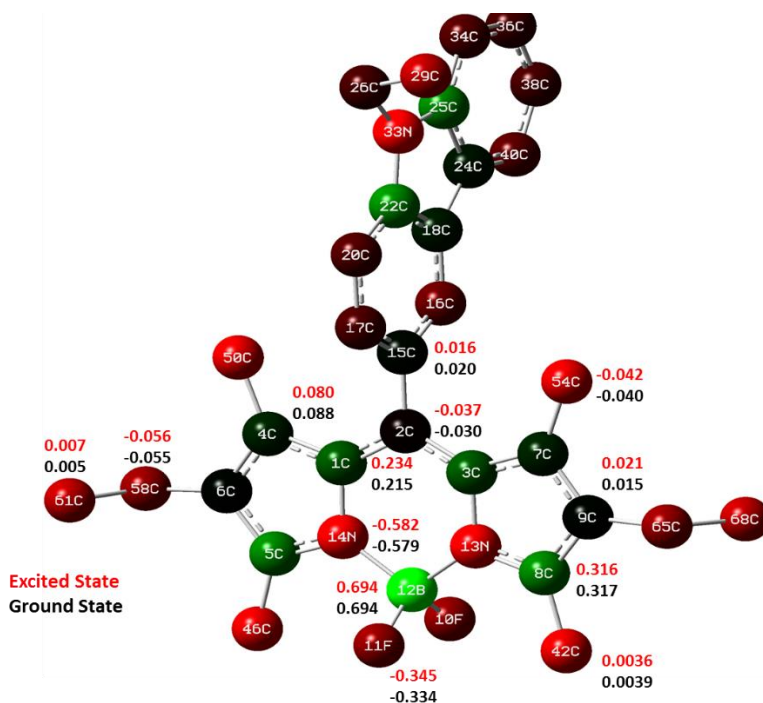

**Fig. S6** Optimized structure in ground ( $S_0$ ) state and Mulliken charges (e.s.u) of the dye 2 in ground state ( $S_0$ ) (black digits) and first excited state ( $S_1$ ) (red digits) in solvent n-heptane, calculated by B3LYP/6-31G(d) level of theory (hydrogen atoms are omitted for more clarity).

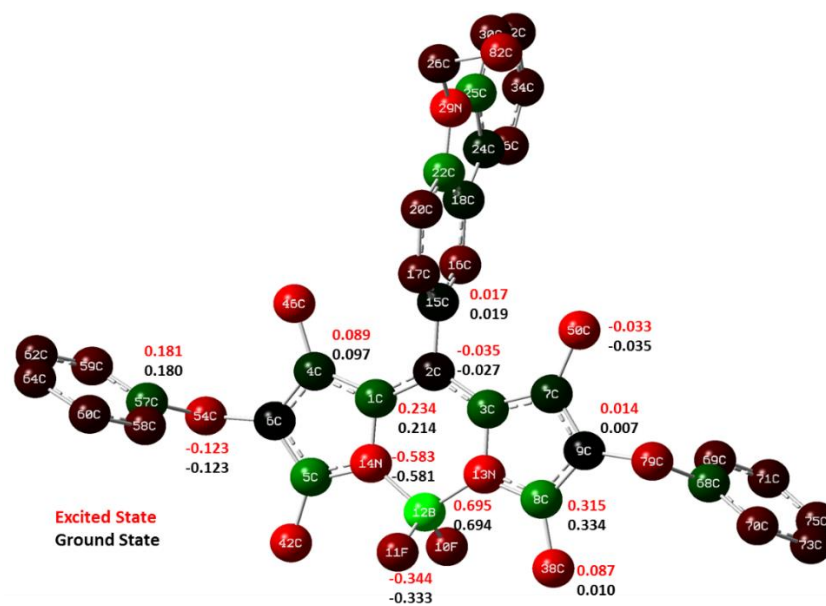

**Fig. S7** Optimized structure in ground (S<sub>0</sub>) state and Mulliken charges (e.s.u) of the dye **3** in ground state (S<sub>0</sub>) (black digits) and first excited state (S<sub>1</sub>) (red digits) in solvent n-heptane, calculated by B3LYP/6-31G(d) level of theory (hydrogen atoms are omitted for more clarity).

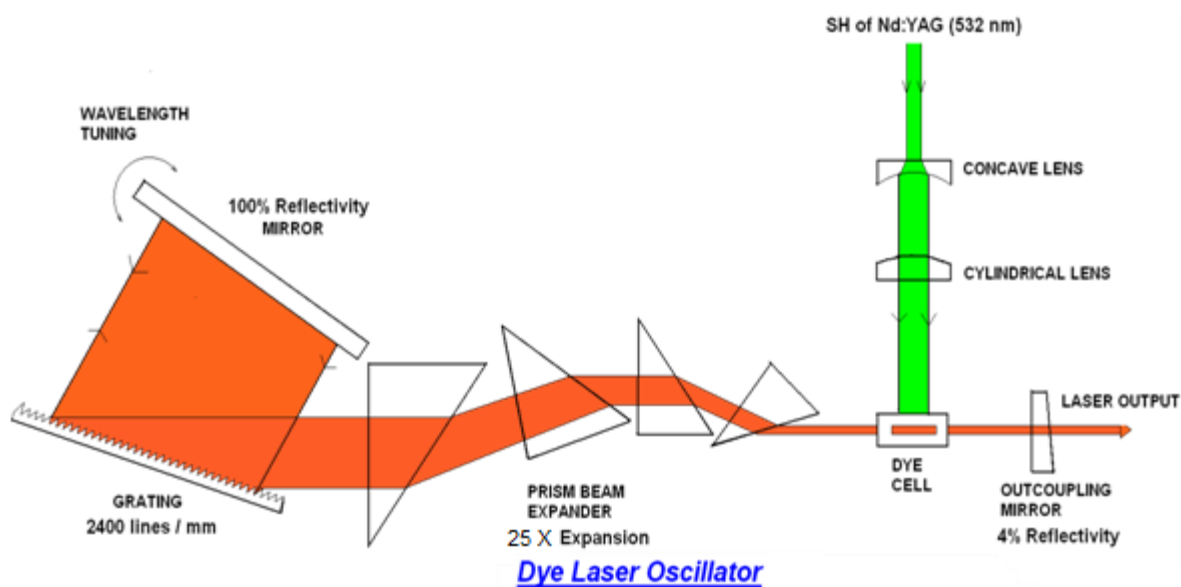

**Fig. 8** A schematic of narrow band dye laser set up used for experiments

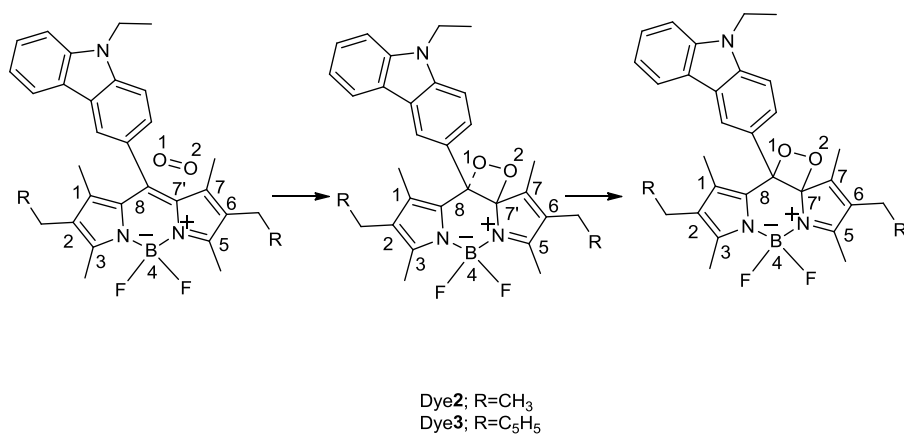

Fig. S9 Plausible reaction mechanism of the dyes **2** and **3** with <sup>1</sup>O<sub>2</sub>

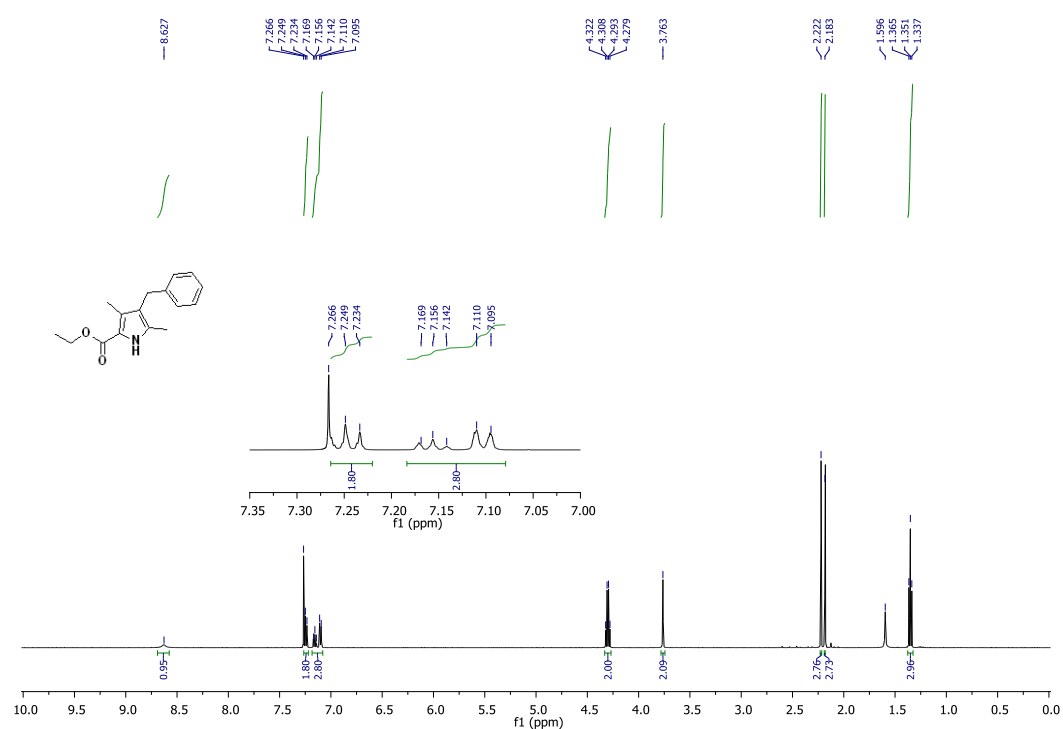

Fig. 10 <sup>1</sup>H NMR spectrum of Ethyl 4-benzyl-3, 5-dimethyl-1H-pyrrole-2-carboxylate (**6**)



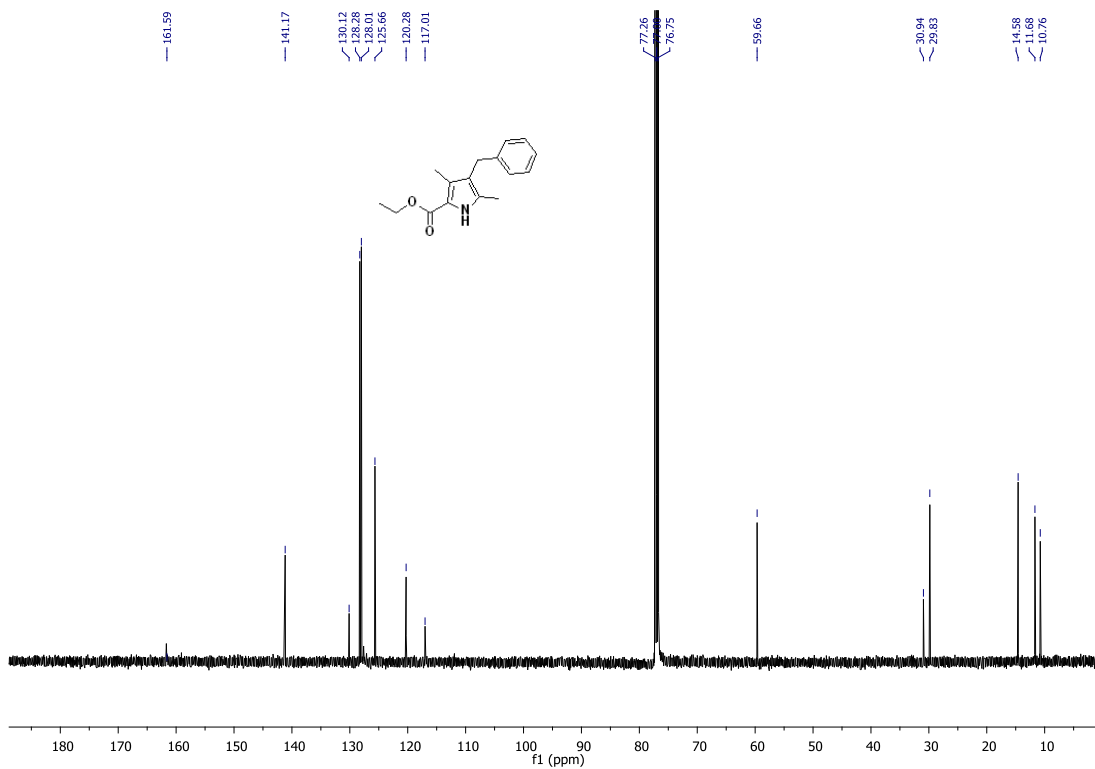

Fig. S11  $^{13}\text{C}$  NMR spectrum of Ethyl 4-benzyl-3, 5-dimethyl-1H-pyrrole-2-carboxylate (6)

2- #10 RT: 0.10 AV: 1 NL: 3.10E6  
T: + c ESI Full ms [ 150.00-270.00]

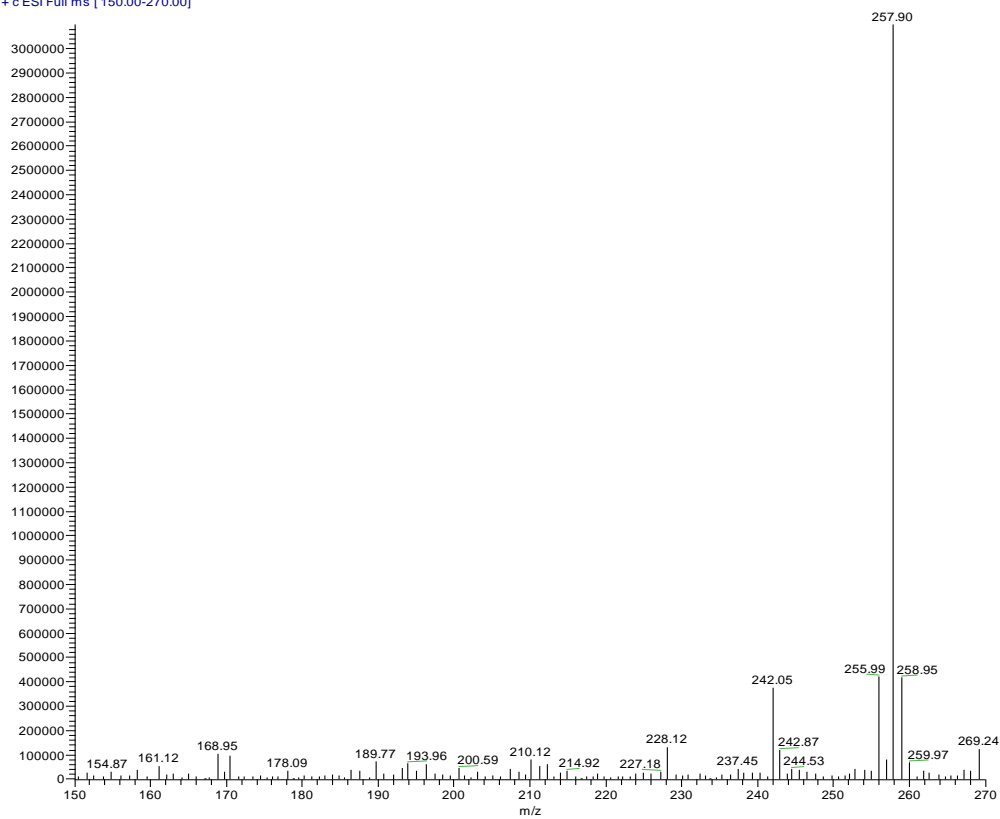

Fig. S12 Mass spectrum of Ethyl 4-benzyl-3, 5-dimethyl-1H-pyrrole-2-carboxylate (6)

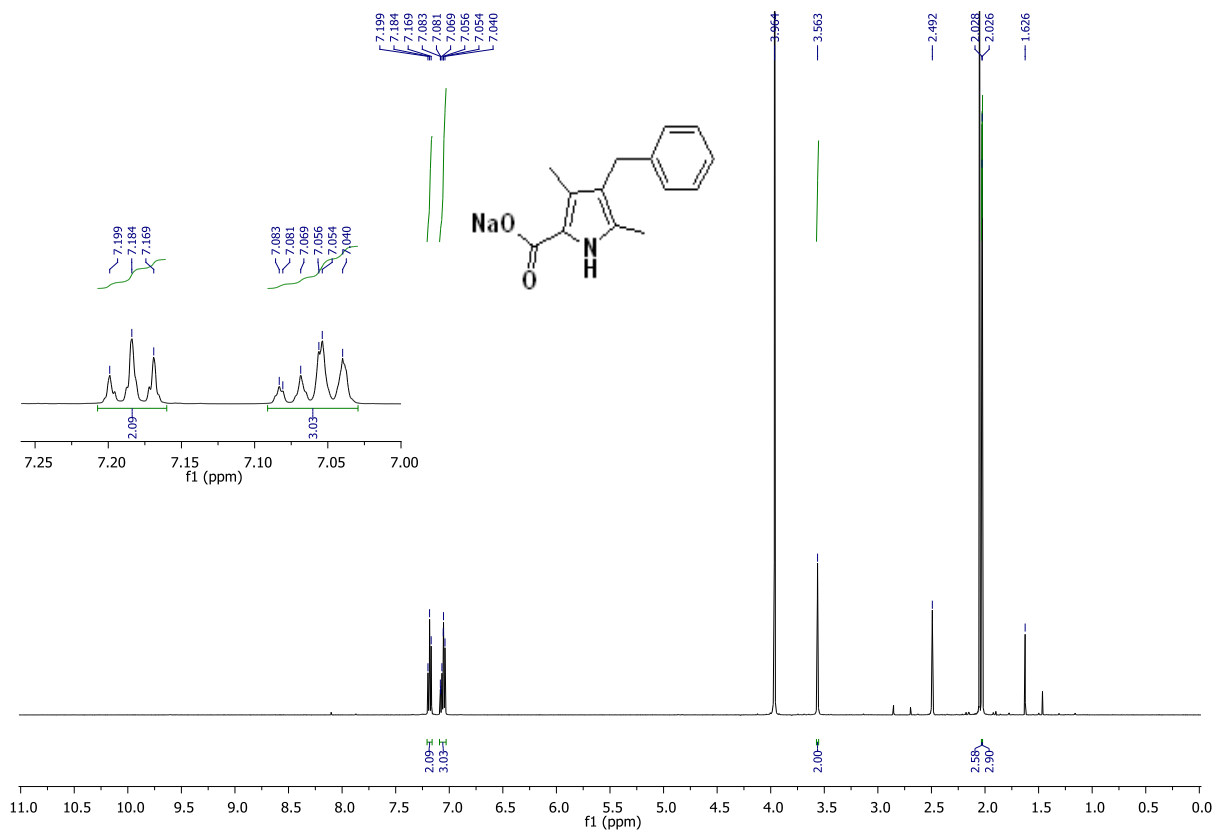

**Fig. S13** <sup>1</sup>H NMR spectrum of sodium 4-benzyl-3, 5-dimethyl-1H-pyrrole-2-carboxylate (**7**)

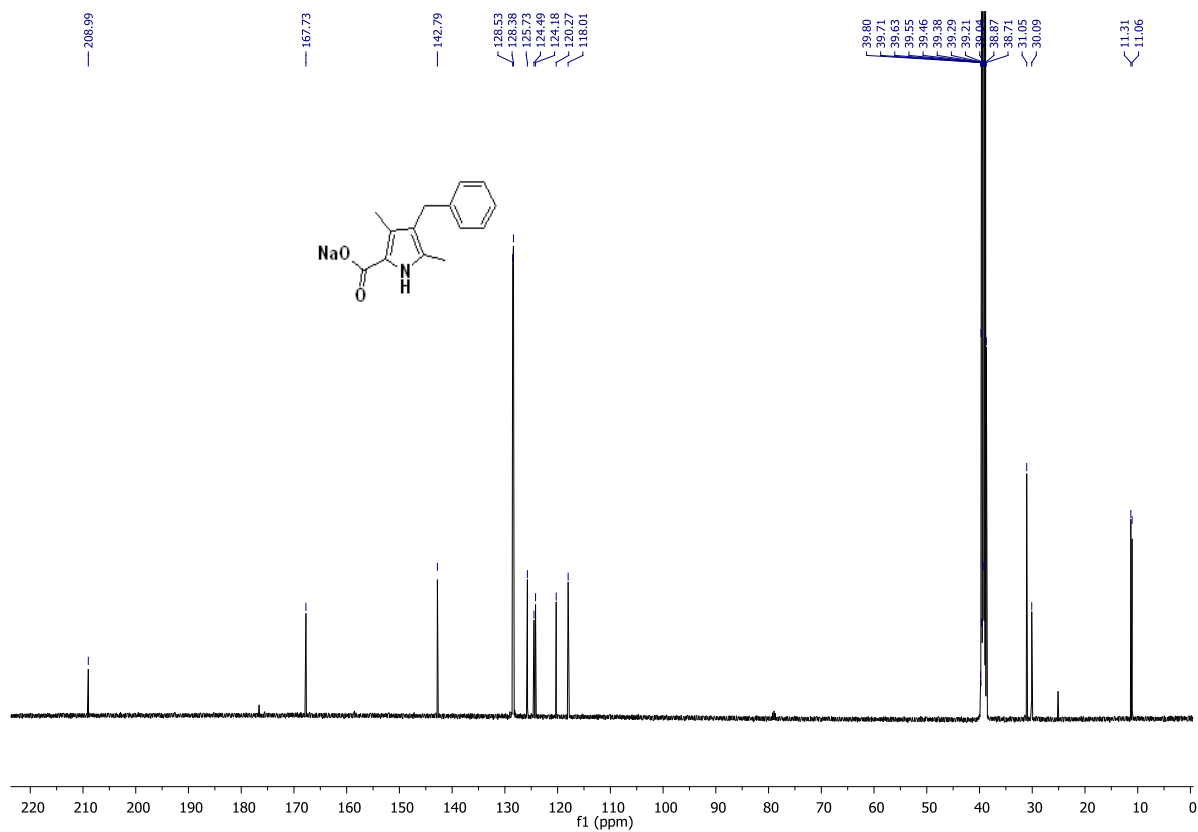

**Fig. S14** <sup>13</sup>C NMR spectrum of sodium 4-benzyl-3, 5-dimethyl-1H-pyrrole-2-carboxylate (**7**)

BENZYL PYROLE ACID #54 RT: 0.59 AV: 1 NL: 2.97E6  
F: -c ESI Full ms [150.00-240.00]

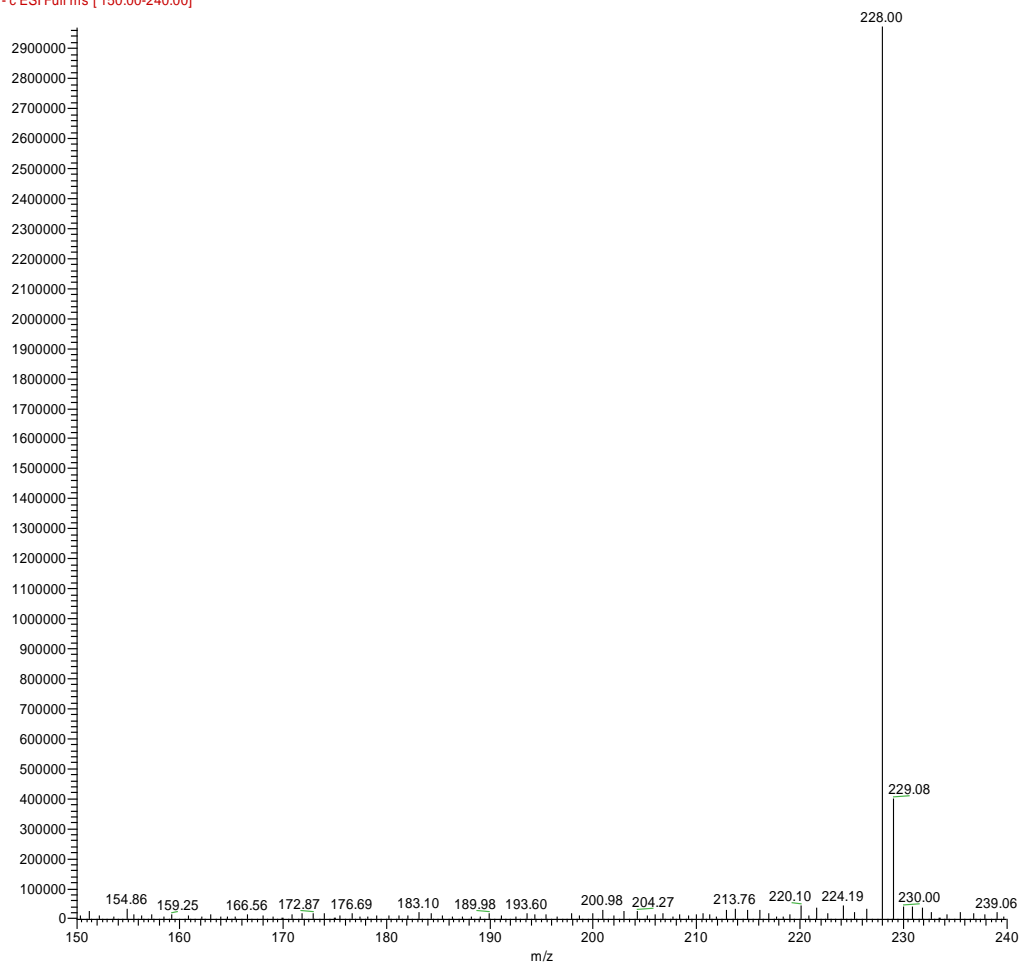

Fig. S15 Mass spectrum of sodium 4-benzyl-3, 5-dimethyl-1H-pyrrole-2-carboxylate (7)

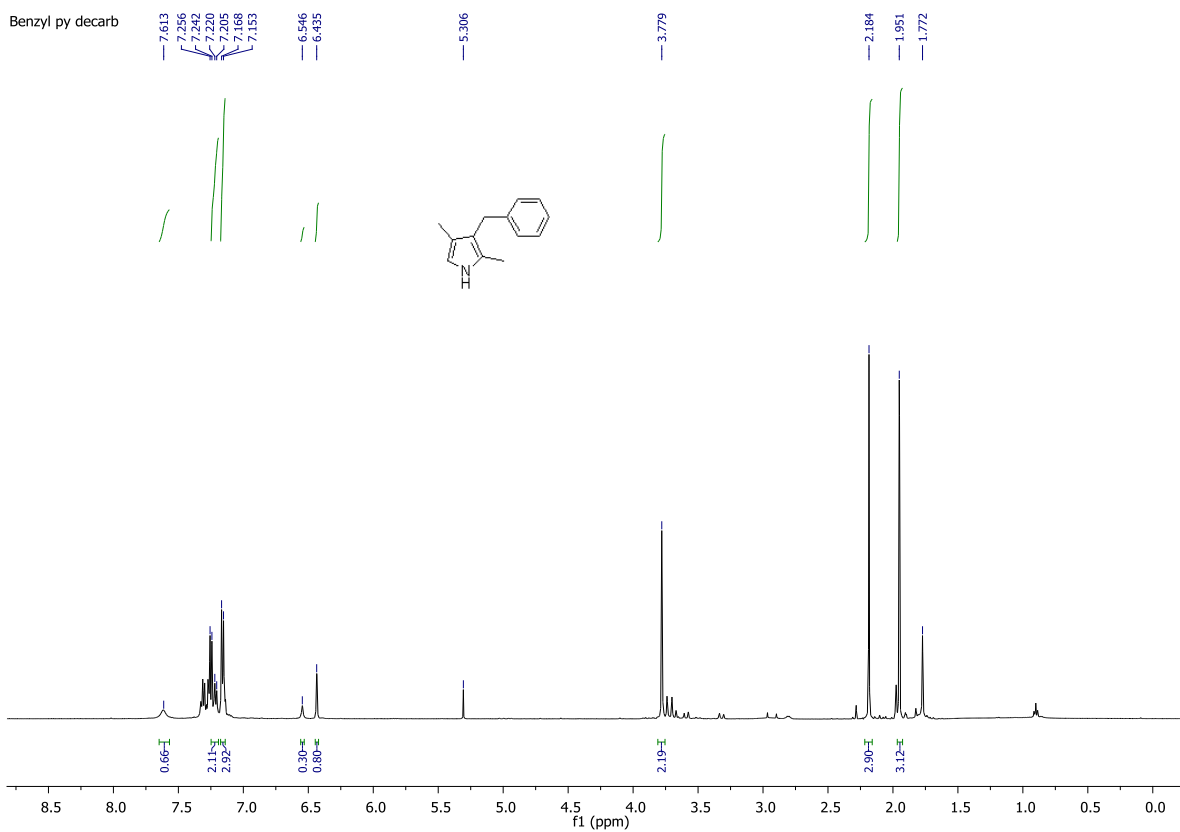

Fig. S16  $^1\text{H}$  NMR spectrum of 3-Benzyl-2, 4-dimethyl-1H-pyrrole (**8**)

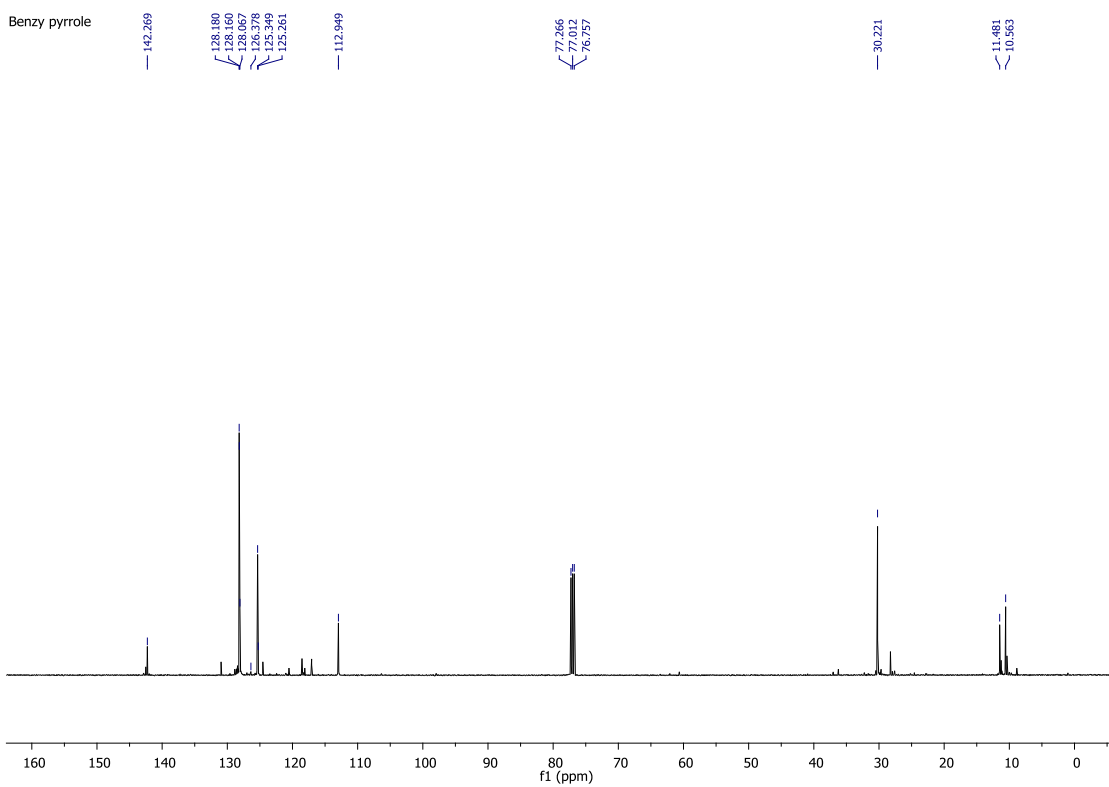

Fig. S17  $^{13}\text{C}$  NMR spectrum of 3-Benzyl-2, 4-dimethyl-1H-pyrrole (**8**)

# Spectrum Plot - 1/19/2015 2:42 PM

1 A Scan 23 from ...ernal 2014-2015\lcms-80\benzyl pyrrole-186-.xms

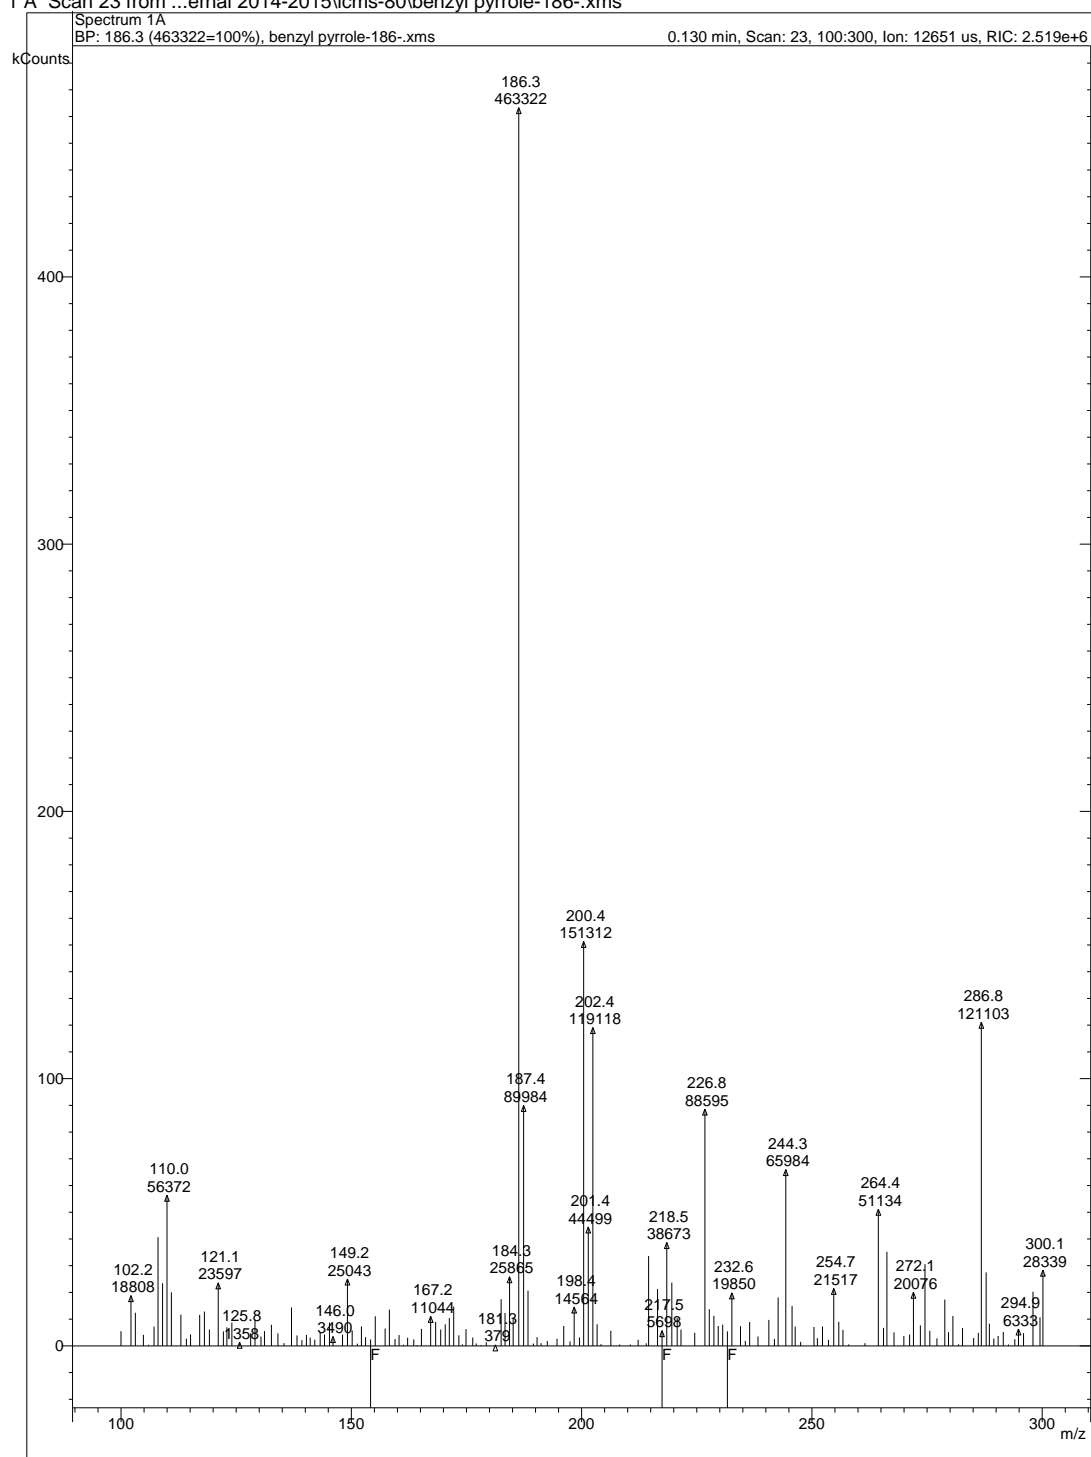

Fig. S18 Mass spectrum of 3-Benzyl-2, 4-dimethyl-1H-pyrrole (8)

Dye2

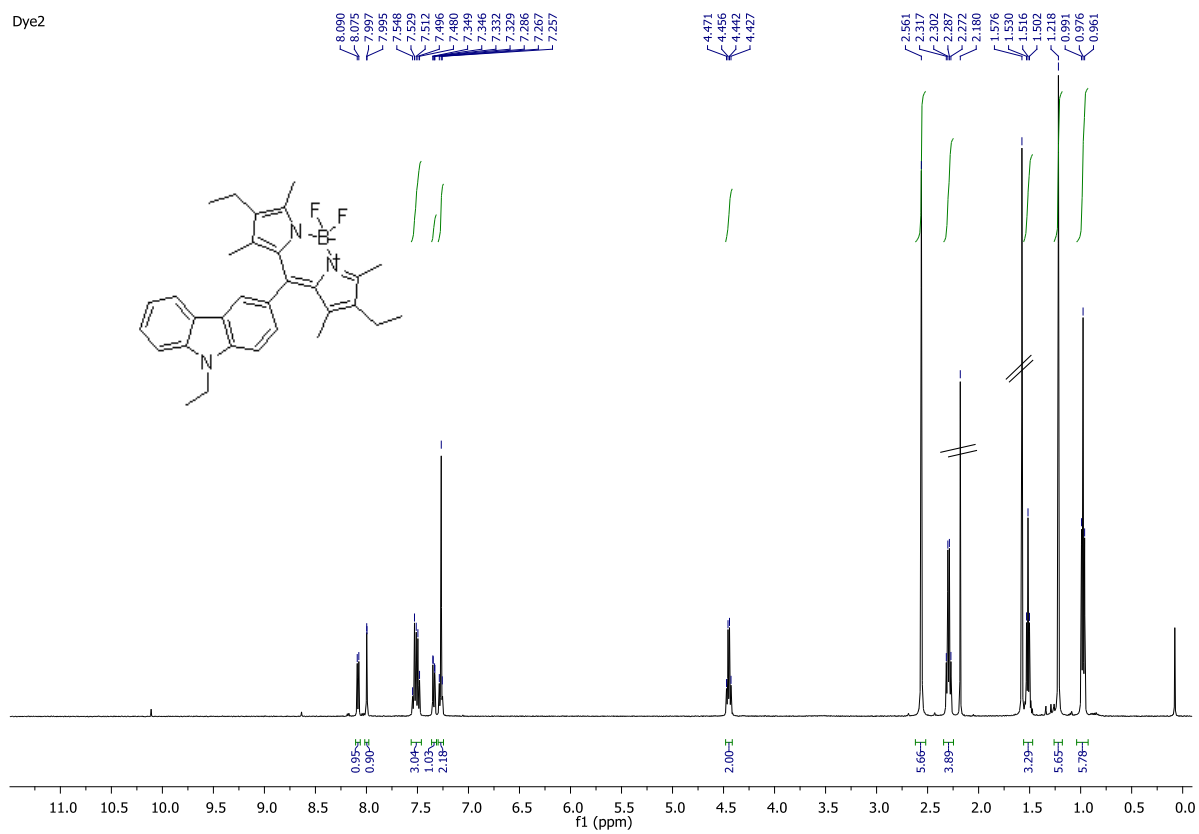

Fig. S19 <sup>1</sup>H NMR spectrum of the dye 2.

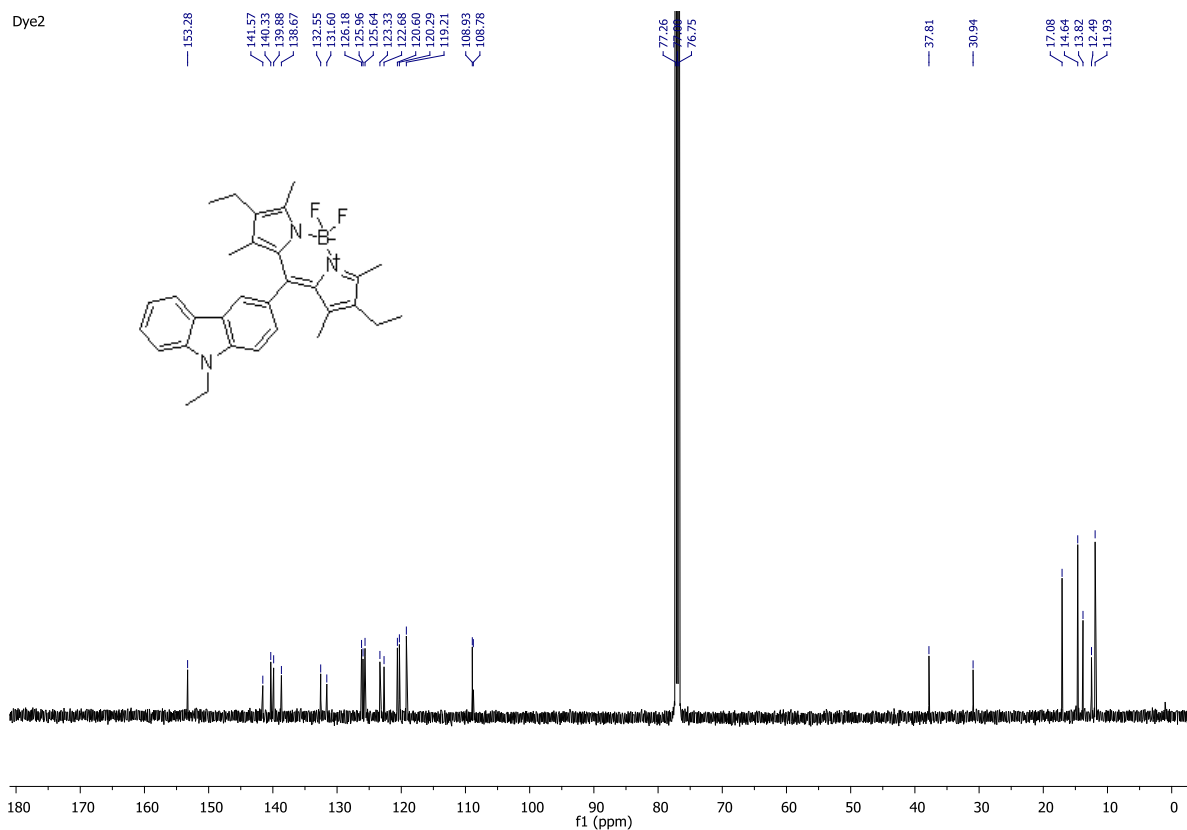

Fig. S20  $^{13}\text{C}$  NMR spectrum of the dye 2.

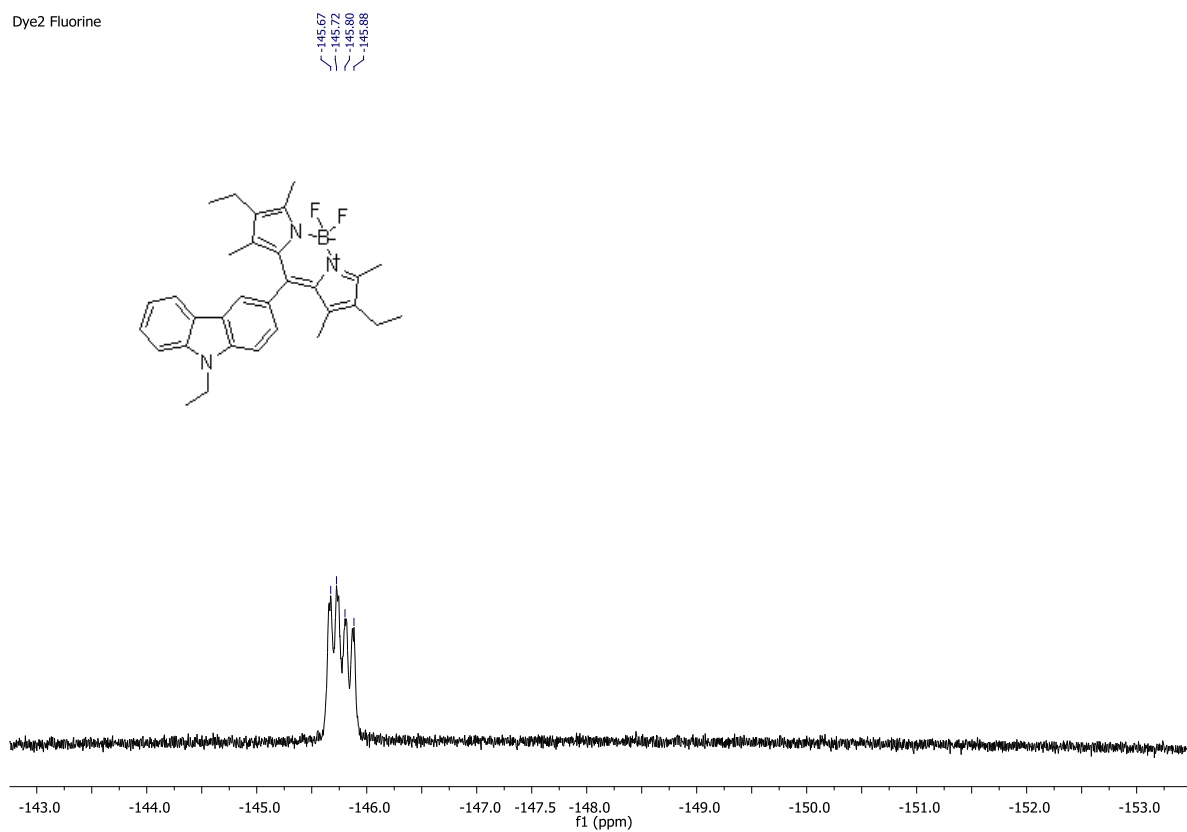

Fig. S21  $^{19}\text{F}$  NMR spectrum of the dye 2.

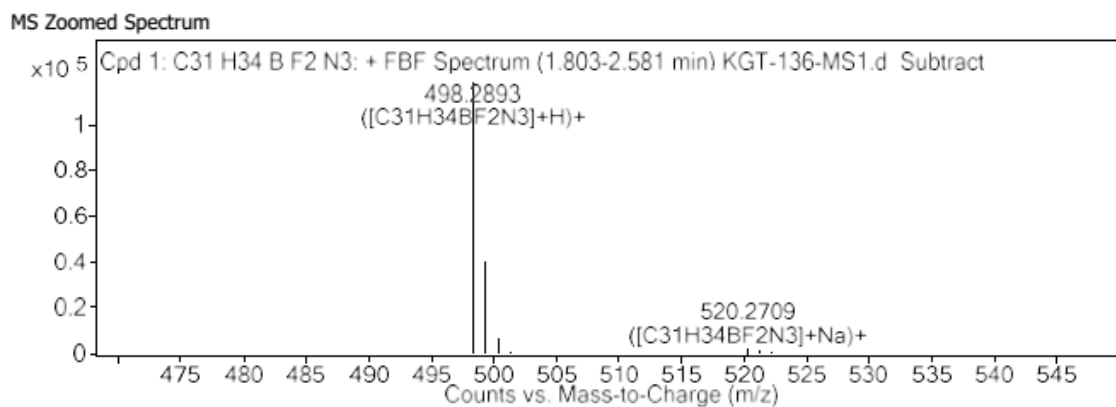

MS Spectrum Peak List

| m/z      | z | Abund     | Formula     | Ion                 |
|----------|---|-----------|-------------|---------------------|
| 498.2893 | 1 | 118870.19 | C31H34BF2N3 | (M+H) <sup>+</sup>  |
| 499.2921 | 1 | 40134.95  | C31H34BF2N3 | (M+H) <sup>+</sup>  |
| 500.2952 | 1 | 6948.03   | C31H34BF2N3 | (M+H) <sup>+</sup>  |
| 501.2988 | 1 | 771.98    | C31H34BF2N3 | (M+H) <sup>+</sup>  |
| 520.2709 | 1 | 2051.9    | C31H34BF2N3 | (M+Na) <sup>+</sup> |
| 521.2742 | 1 | 967.78    | C31H34BF2N3 | (M+Na) <sup>+</sup> |
| 522.2763 | 1 | 537.07    | C31H34BF2N3 | (M+Na) <sup>+</sup> |

Fig. S22 HRMS spectrum of the dye 2.

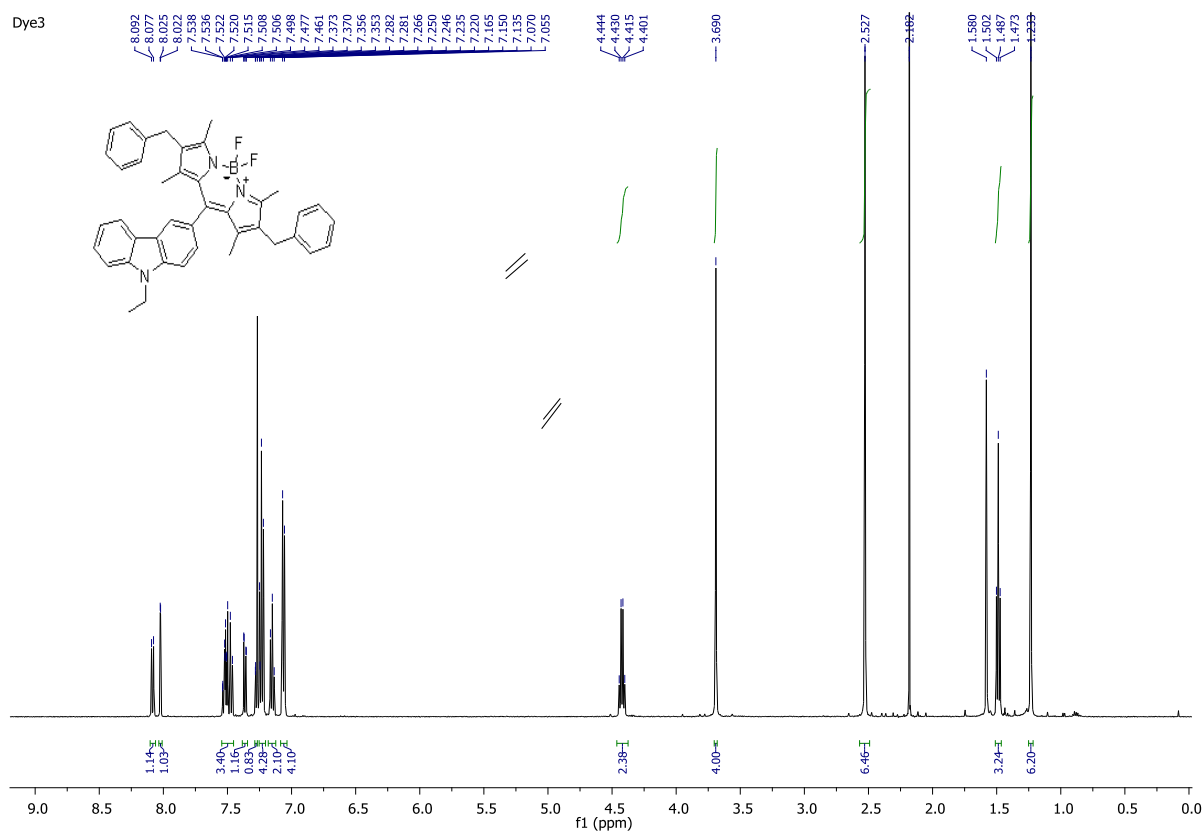

Fig. S23 <sup>1</sup>H NMR spectrum of the dye 3.



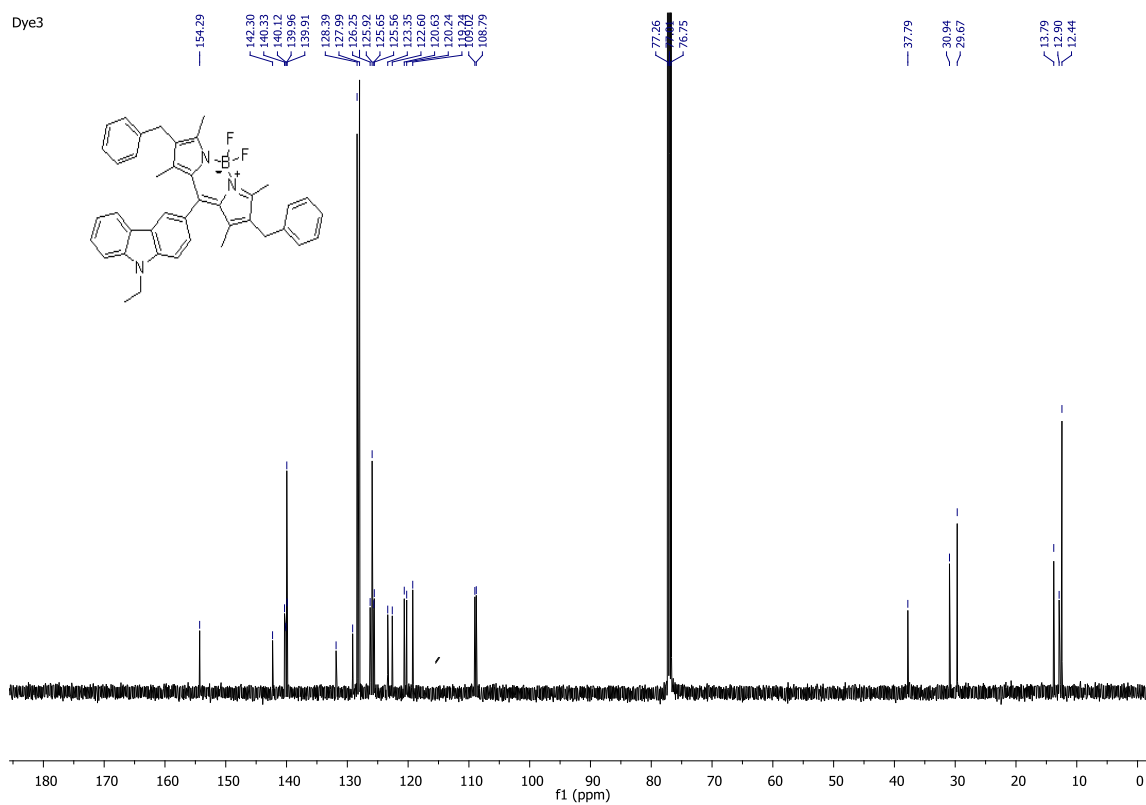

Fig. S24  $^{13}\text{C}$  NMR spectrum of the dye 3.

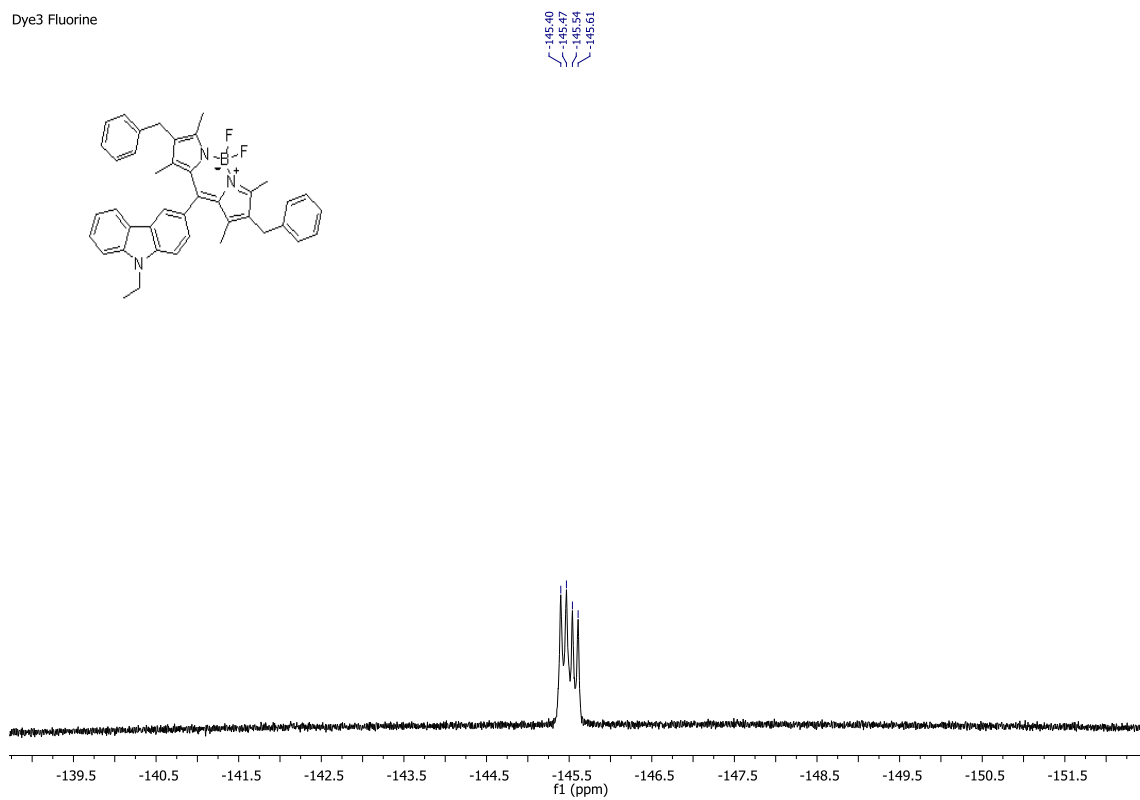

Fig. S25  $^{19}\text{F}$  NMR spectrum of the dye 3.

## MS Zoomed Spectrum

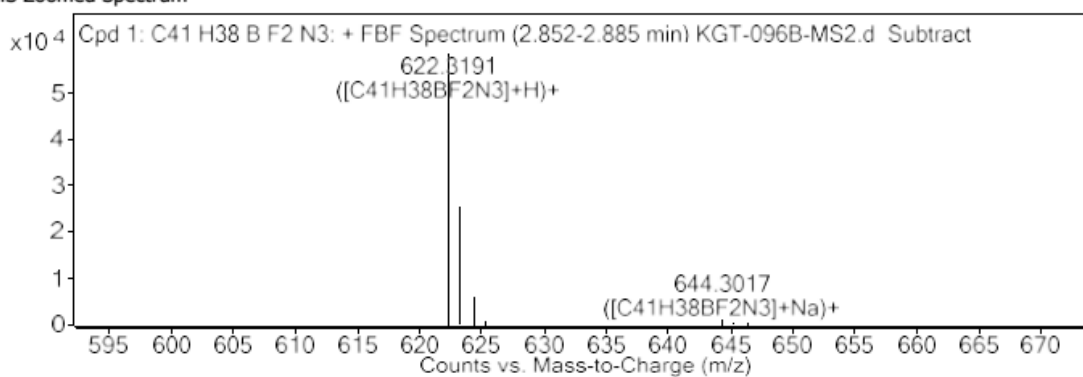

## MS Spectrum Peak List

| $m/z$    | $z$ | Abund    | Formula                                                        | Ion                 |
|----------|-----|----------|----------------------------------------------------------------|---------------------|
| 622.3191 | 1   | 58282.21 | C <sub>41</sub> H <sub>38</sub> BF <sub>2</sub> N <sub>3</sub> | (M+H) <sup>+</sup>  |
| 623.3221 | 1   | 25492.14 | C <sub>41</sub> H <sub>38</sub> BF <sub>2</sub> N <sub>3</sub> | (M+H) <sup>+</sup>  |
| 624.3247 | 1   | 5864.28  | C <sub>41</sub> H <sub>38</sub> BF <sub>2</sub> N <sub>3</sub> | (M+H) <sup>+</sup>  |
| 625.3301 | 1   | 605.49   | C <sub>41</sub> H <sub>38</sub> BF <sub>2</sub> N <sub>3</sub> | (M+H) <sup>+</sup>  |
| 644.3017 | 1   | 810.02   | C <sub>41</sub> H <sub>38</sub> BF <sub>2</sub> N <sub>3</sub> | (M+Na) <sup>+</sup> |
| 645.3052 | 1   | 546.92   | C <sub>41</sub> H <sub>38</sub> BF <sub>2</sub> N <sub>3</sub> | (M+Na) <sup>+</sup> |
| 646.316  | 1   | 430.4    | C <sub>41</sub> H <sub>38</sub> BF <sub>2</sub> N <sub>3</sub> | (M+Na) <sup>+</sup> |

Fig. S26 HRMS spectrum of the dye 3.
